# Supplementary material for: The Association Between Patient Satisfaction and Patient-Reported Health Outcomes
Source: PubMed Central journal article supplement — J Patient Exp. 2018 Aug 27;6(3):201–9. doi: 10.1177/2374373518795414 (PMC6739681; doi:10.1177/2374373518795414), 2018-08-27
Supplement: Supplemental_Table_1_(1).pdf [file Supplemental_Table_1_%281%29.pdf]

**Supplemental Table 1.** Targeted groups of diseases as a selection for eligible patients

| <b>Disease Grouping</b>                                     | <b>Applicable Codes</b>                            |
|-------------------------------------------------------------|----------------------------------------------------|
| HPB                                                         | 6, 16-17, 149, 151-152                             |
| Pulmonary                                                   | 1, 19-20, 56, 122-134                              |
| Cardiovascular                                              | 96-119, 121, 213                                   |
| Endocrine/Metabolic                                         | 36, 48-51, 58                                      |
| Hematologic (including hematologic malignancy)              | 37-40, 59-64                                       |
| Renal/GU/GYNE                                               | 25-34, 46, 156-163, 164-166, 168-173, 215          |
| Gastrointestinal Disease (including malignancy of GI tract) | 12-15, 18, 120, 135, 138-148, 153-155, 214, 250-51 |
| Psychiatric                                                 | 650-660, 663                                       |
